# Supplementary material for: Human Health Risk Assessment of Nitrate and Trace Metals Via Groundwater in Central Bangladesh
Source: Preprints.org preprint supplement (doi:10.20944/preprints201901.0075.v1), 2019-01-08
Supplement: Supplementary file 2 [file supplementary]

## Sheet: Main data
Sample_ID	Depth (m)	As (ug/l)	Fe (ug/l)	Mn (ug/l)	NO3 (mg/l)
S1	21.336	0	12	449	138.95
S2	15.24	25	134	241	225.99
S3	18.288	30	1	295	131.72
S4	18.288	23	1	765	195.85
S5	30.48	27	3	640	434.27
S6	16.764	17	1	432	54.4
S7	18.288	14	1	276	167.61
S8	21.336	14	2	532	207.82
S9	15.24	56	91	380	128.18
S10	35.052	77	3	1037	226.79
S11	21.336	72	1	129	155.94
S12	51.816	44	3	148	265.95
S13	21.336	41	9262	510	510.63
S14	18.288	67	2	314	288.42
S15	24.384	26	3	343	146.31
S16	18.288	31	4	245	123.62
S17	30.48	0	3	277	295.75
S18	28.956	44	1843	161	116.98
S19	18.288	7	4	286	135.31
S20	21.336	39	4	789	89.3
S21	18.288	28	6	293	167.95
S22	21.336	23	4	328	147.66
S23	36.576	65	2	129	119.69
S24	13.716	65	0	175	77.01
S25	15.24	18	2	238	153.98
S26	28.956	38	1	87	41.79
S27	21.336	69	59	259	207.17
S28	18.288	39	1	639	257.49
S29	18.288	113	19296	638	567.27
S30	30.48	26	0	177	316.61
S31	12.192	0	2	678	347.2
S32	30.48	69	4	840	252.25
S33	15.24	24	4	290	472.24
S34	27.432	25	1	695	319.06
S35	27.432	54	1	496	398.31
S36	21.336	15	6	622	588.04
S37	21.336	27	423	853	241.93
S38	21.336	0	4	456	101.43
S39	21.336	0	1	280	344.88
S40	24.384	0	3	188	67.15
S41	18.288	0	5	276	124.32
S42	18.288	27	5	413	134.35
S43	22.86	0	2	420	180.01
S44	15.24	0	4	318	161.7
S45	21.336	0	9	412	205.01
S46	33.528	0	1	54	292.42
S47	27.432	0	25	192	281.14
S48	22.86	0	29	162	84.97
S49	30.48	0	14	239	132.08
S50	30.48	17	2818	543	408.47
S51	30.48	19	3582	189	589.46
S52	21.336	21	0	170	516.38
S53	27.432	60	10967	369	272.36
S54	21.336	0	2	323	708.11
S55	24.384	27	2	131	215.64
S56	38.1	0	2	190	165.49
S57	21.336	0	2	172	177.78
S58	18.288	14	0	287	45.12
S59	18.288	0	11	74	287.49
S60	18.288	29	6475	403	98.95
S61	18.288	0	1321	218	667.69
S62	18.288	45	0	865	359.03
S63	18.288	0	3	79	13.75
S64	18.288	0	2	612	251.58
S65	45.72	0	2	397	153.76
S66	16.764	0	3	414	103.62
S67	18.288	0	0	363	602.9
S68	27.432	70	1	831	277.78
S69	15.24	35	0	1543	253.6
S70	18.288	0	1	754	198.49
S71	21.336	0	0	716	419.76
S72	27.432	23	0	1257	260.2
S73	10.668	0	3	247	144.87
S74	10.668	40	2	190	0
S75	10.668	0	1	229	9.83
S76	48.768	13	5636	307	594.11
S77	25.908	0	2	2716	371.6
S78	13.716	0	3	853	314.38
S79	30.48	0	2	364	118.8
S80	13.716	0	2	899	313.25
S81	60.96	0	2	149	11.88
S82	10.668	0	1	795	14.24
S83	36.576	0	6	609	378.37
S84	36.576	0	1	257	315.16
S85	18.288	0	8	160	13.36
S86	27.432	0	13	783	105.98
S87	12.192	0	8	1009	91.88
S88	76.2	0	34	239	30.35
S89	39.624	72	48	338	234.7
S90	21.336	0	8	270	323.58
S91	21.336	0	2	2037	541.47
S92	21.336	0	754	273	290.58
S93	21.336	50	436	345	480.2
S94	21.336	0	9	138	297.18
S95	21.336	0	43	175	314.61
S96	82.296	11	9701	487	625.8
S97	21.336	0	5384	236	590.2
S98	18.288	0	7	658	307.82
S99	21.336	0	1722	304	357.88

## Sheet: HQ_HI_CR oral
Sample ID	HI oral for Adult	HI oral for Child			Sample ID	HQ Adult for As	HQ Child for As	Sample ID	HQ Adult for Fe	HQ Child for Fe	Sample ID	HQ Adult for Mn	HQ Child for Mn	Sample ID	HQ Adult for NO3	HQ Child for NO3		Sample_ID	Cancer Risk Adult	Cancer Risk Child
S1	3.4362	4.37335			S1	0	0	S1	0.00125714	0.0016	S1	0.705571	0.898	S1	2.72938	3.47375		S1	0	0
S2	7.45089	9.48295			S2	2.61905	3.33333	S2	0.0140381	0.0178667	S2	0.378714	0.482	S2	4.43909	5.64975		S2	0.00117857	0.0015
S3	6.19389	7.88313			S3	3.14286	4	S3	0.000104762	0.000133333	S3	0.463571	0.59	S3	2.58736	3.293		S3	0.00141429	0.0018
S4	7.45883	9.49305			S4	2.40952	3.06667	S4	0.000104762	0.000133333	S4	1.20214	1.53	S4	3.84705	4.89625		S4	0.00108429	0.00138
S5	12.3649	15.7371			S5	2.82857	3.6	S5	0.000314286	0.0004	S5	1.00571	1.28	S5	8.5303	10.8567		S5	0.00127286	0.00162
S6	3.52849	4.4908			S6	1.78095	2.26667	S6	0.000104762	0.000133333	S6	0.678857	0.864	S6	1.06857	1.36		S6	0.000801429	0.00102
S7	5.19283	6.60905			S7	1.46667	1.86667	S7	0.000104762	0.000133333	S7	0.433714	0.552	S7	3.29234	4.19025		S7	0.00066	0.00084
S8	6.38505	8.12643			S8	1.46667	1.86667	S8	0.000209524	0.000266667	S8	0.836	1.064	S8	4.08218	5.1955		S8	0.00066	0.00084
S9	8.99116	11.4433			S9	5.86667	7.46667	S9	0.00953333	0.0121333	S9	0.597143	0.76	S9	2.51782	3.2045		S9	0.00264	0.00336
S10	14.1514	18.0108			S10	8.06667	10.2667	S10	0.000314286	0.0004	S10	1.62957	2.074	S10	4.4548	5.66975		S10	0.00363	0.00462
S11	10.8088	13.7566			S11	7.54286	9.6	S11	0.000104762	0.000133333	S11	0.202714	0.258	S11	3.06311	3.8985		S11	0.00339429	0.00432
S12	10.0664	12.8118			S12	4.60952	5.86667	S12	0.000314286	0.0004	S12	0.232571	0.296	S12	5.22402	6.64875		S12	0.00207429	0.00264
S13	16.0972	20.4873			S13	4.29524	5.46667	S13	0.970305	1.23493	S13	0.801429	1.02	S13	10.0302	12.7658		S13	0.00193286	0.00246
S14	13.1781	16.7721			S14	7.01905	8.93333	S14	0.000209524	0.000266667	S14	0.493429	0.628	S14	5.66539	7.2105		S14	0.00315857	0.00402
S15	6.13707	7.81082			S15	2.72381	3.46667	S15	0.000314286	0.0004	S15	0.539	0.686	S15	2.87395	3.65775		S15	0.00122571	0.00156
S16	6.06129	7.71437			S16	3.24762	4.13333	S16	0.000419048	0.000533333	S16	0.385	0.49	S16	2.42825	3.0905		S16	0.00146143	0.00186
S17	6.24498	7.94815			S17	0	0	S17	0.000314286	0.0004	S17	0.435286	0.554	S17	5.80938	7.39375		S17	0	0
S18	7.35342	9.3589			S18	4.60952	5.86667	S18	0.193076	0.245733	S18	0.253	0.322	S18	2.29782	2.9245		S18	0.00207429	0.00264
S19	3.84106	4.88862			S19	0.733333	0.933333	S19	0.000419048	0.000533333	S19	0.449429	0.572	S19	2.65788	3.38275		S19	0.00033	0.00042
S20	7.0801	9.01103			S20	4.08571	5.2	S20	0.000419048	0.000533333	S20	1.23986	1.578	S20	1.75411	2.2325		S20	0.00183857	0.00234
S21	6.69341	8.51888			S21	2.93333	3.73333	S21	0.000628571	0.0008	S21	0.460429	0.586	S21	3.29902	4.19875		S21	0.00132	0.00168
S22	5.82584	7.4147			S22	2.40952	3.06667	S22	0.000419048	0.000533333	S22	0.515429	0.656	S22	2.90046	3.6915		S22	0.00108429	0.00138
S23	9.3635	11.9172			S23	6.80952	8.66667	S23	0.000209524	0.000266667	S23	0.202714	0.258	S23	2.35105	2.99225		S23	0.00306429	0.0039
S24	8.59722	10.9419			S24	6.80952	8.66667	S24	0	0	S24	0.275	0.35	S24	1.5127	1.92525		S24	0.00306429	0.0039
S25	5.28453	6.72577			S25	1.88571	2.4	S25	0.000209524	0.000266667	S25	0.374	0.476	S25	3.02461	3.8495		S25	0.000848571	0.00108
S26	4.93865	6.28555			S26	3.98095	5.06667	S26	0.000104762	0.000133333	S26	0.136714	0.174	S26	0.820875	1.04475		S26	0.00179143	0.00228
S27	11.7112	14.9051			S27	7.22857	9.2	S27	0.00618095	0.00786667	S27	0.407	0.518	S27	4.06941	5.17925		S27	0.00325286	0.00414
S28	10.1478	12.9154			S28	4.08571	5.2	S28	0.000104762	0.000133333	S28	1.00414	1.278	S28	5.05784	6.43725		S28	0.00183857	0.00234
S29	26.005	33.0972			S29	11.8381	15.0667	S29	2.02149	2.5728	S29	1.00257	1.276	S29	11.1428	14.1817		S29	0.00532714	0.00678
S30	9.22108	11.7359			S30	2.72381	3.46667	S30	0	0	S30	0.278143	0.354	S30	6.21913	7.91525		S30	0.00122571	0.00156
S31	7.88564	10.0363			S31	0	0	S31	0.000209524	0.000266667	S31	1.06543	1.356	S31	6.82	8.68		S31	0	0
S32	13.5039	17.1868			S32	7.22857	9.2	S32	0.000419048	0.000533333	S32	1.32	1.68	S32	4.95491	6.30625		S32	0.00325286	0.00414
S33	12.2466	15.5865			S33	2.51429	3.2	S33	0.000419048	0.000533333	S33	0.455714	0.58	S33	9.27614	11.806		S33	0.00113143	0.00144
S34	9.97855	12.7			S34	2.61905	3.33333	S34	0.000104762	0.000133333	S34	1.09214	1.39	S34	6.26725	7.9765		S34	0.00117857	0.0015
S35	14.2606	18.1499			S35	5.65714	7.2	S35	0.000104762	0.000133333	S35	0.779429	0.992	S35	7.82395	9.95775		S35	0.00254571	0.00324
S36	14.1003	17.9458			S36	1.57143	2	S36	0.000628571	0.0008	S36	0.977429	1.244	S36	11.5508	14.701		S36	0.000707143	0.0009
S37	8.96551	11.4107			S37	2.82857	3.6	S37	0.0443143	0.0564	S37	1.34043	1.706	S37	4.7522	6.04825		S37	0.00127286	0.00162
S38	2.70937	3.44828			S38	0	0	S38	0.000419048	0.000533333	S38	0.716571	0.912	S38	1.99238	2.53575		S38	0	0
S39	7.21453	9.18213			S39	0	0	S39	0.000104762	0.000133333	S39	0.44	0.56	S39	6.77443	8.622		S39	0	0
S40	1.61476	2.05515			S40	0	0	S40	0.000314286	0.0004	S40	0.295429	0.376	S40	1.31902	1.67875		S40	0	0
S41	2.87624	3.66067			S41	0	0	S41	0.00052381	0.000666667	S41	0.433714	0.552	S41	2.442	3.108		S41	0	0
S42	6.11711	7.78542			S42	2.82857	3.6	S42	0.00052381	0.000666667	S42	0.649	0.826	S42	2.63902	3.35875		S42	0.00127286	0.00162
S43	4.19612	5.34052			S43	0	0	S43	0.000209524	0.000266667	S43	0.66	0.84	S43	3.53591	4.50025		S43	0	0
S44	3.67638	4.67903			S44	0	0	S44	0.000419048	0.000533333	S44	0.499714	0.636	S44	3.17625	4.0425		S44	0	0
S45	4.67535	5.95045			S45	0	0	S45	0.000942857	0.0012	S45	0.647429	0.824	S45	4.02698	5.12525		S45	0	0
S46	5.82893	7.41863			S46	0	0	S46	0.000104762	0.000133333	S46	0.0848571	0.108	S46	5.74396	7.3105		S46	0	0
S47	5.82673	7.41583			S47	0	0	S47	0.00261905	0.00333333	S47	0.301714	0.384	S47	5.52239	7.0285		S47	0	0
S48	1.92666	2.45212			S48	0	0	S48	0.0030381	0.00386667	S48	0.254571	0.324	S48	1.66905	2.12425		S48	0	0
S49	2.97147	3.78187			S49	0	0	S49	0.00146667	0.00186667	S49	0.375571	0.478	S49	2.59443	3.302		S49	0	0
S50	10.953	13.9402			S50	1.78095	2.26667	S50	0.295219	0.375733	S50	0.853286	1.086	S50	8.02352	10.2118		S50	0.000801429	0.00102
S51	14.2414	18.1254			S51	1.99048	2.53333	S51	0.375257	0.4776	S51	0.297	0.378	S51	11.5787	14.7365		S51	0.000895714	0.00114
S52	12.6103	16.0495			S52	2.2	2.8	S52	0	0	S52	0.267143	0.34	S52	10.1432	12.9095		S52	0.00099	0.00126
S53	13.3644	17.0093			S53	6.28571	8	S53	1.14892	1.46227	S53	0.579857	0.738	S53	5.34993	6.809		S53	0.00282857	0.0036
S54	14.4171	18.349			S54	0	0	S54	0.000209524	0.000266667	S54	0.507571	0.646	S54	13.9093	17.7028		S54	0	0
S55	7.27042	9.25327			S55	2.82857	3.6	S55	0.000209524	0.000266667	S55	0.205857	0.262	S55	4.23579	5.391		S55	0.00127286	0.00162
S56	3.54948	4.51752			S56	0	0	S56	0.000209524	0.000266667	S56	0.298571	0.38	S56	3.2507	4.13725		S56	0	0
S57	3.7626	4.78877			S57	0	0	S57	0.000209524	0.000266667	S57	0.270286	0.344	S57	3.49211	4.4445		S57	0	0
S58	2.80395	3.56867			S58	1.46667	1.86667	S58	0	0	S58	0.451	0.574	S58	0.886286	1.128		S58	0.00066	0.00084
S59	5.76456	7.33672			S59	0	0	S59	0.00115238	0.00146667	S59	0.116286	0.148	S59	5.64712	7.18725		S59	0	0
S60	6.29338	8.00975			S60	3.0381	3.86667	S60	0.678333	0.863333	S60	0.633286	0.806	S60	1.94366	2.47375		S60	0.00136714	0.00174
S61	13.5963	17.3044			S61	0	0	S61	0.13839	0.176133	S61	0.342571	0.436	S61	13.1153	16.6922		S61	0	0
S62	13.1259	16.7058			S62	4.71429	6	S62	0	0	S62	1.35929	1.73	S62	7.05238	8.97575		S62	0.00212143	0.0027
S63	0.394546	0.50215			S63	0	0	S63	0.000314286	0.0004	S63	0.124143	0.158	S63	0.270089	0.34375		S63	0	0
S64	5.90367	7.51377			S64	0	0	S64	0.000209524	0.000266667	S64	0.961714	1.224	S64	4.94175	6.2895		S64	0	0
S65	3.64435	4.63827			S65	0	0	S65	0.000209524	0.000266667	S65	0.623857	0.794	S65	3.02029	3.844		S65	0	0
S66	2.68628	3.4189			S66	0	0	S66	0.000314286	0.0004	S66	0.650571	0.828	S66	2.03539	2.5905		S66	0	0
S67	12.4131	15.7985			S67	0	0	S67	0	0	S67	0.570429	0.726	S67	11.8427	15.0725		S67	0	0
S68	14.0957	17.94			S68	7.33333	9.33333	S68	0.000104762	0.000133333	S68	1.30586	1.662	S68	5.45639	6.9445		S68	0.0033	0.0042
S69	11.0728	14.0927			S69	3.66667	4.66667	S69	0	0	S69	2.42471	3.086	S69	4.98143	6.34		S69	0.00165	0.0021
S70	5.08387	6.47038			S70	0	0	S70	0.000104762	0.000133333	S70	1.18486	1.508	S70	3.89891	4.96225		S70	0	0
S71	9.37043	11.926			S71	0	0	S71	0	0	S71	1.12514	1.432	S71	8.24529	10.494		S71	0	0
S72	9.49588	12.0857			S72	2.40952	3.06667	S72	0	0	S72	1.97529	2.514	S72	5.11107	6.505		S72	0.00108429	0.00138
S73	3.23412	4.11615			S73	0	0	S73	0.000314286	0.0004	S73	0.388143	0.494	S73	2.84566	3.62175		S73	0	0
S74	4.48926	5.7136			S74	4.19048	5.33333	S74	0.000209524	0.000266667	S74	0.298571	0.38	S74	0	0		S74	0.00188571	0.0024
S75	0.553051	0.703883			S75	0	0	S75	0.000104762	0.000133333	S75	0.359857	0.458	S75	0.193089	0.24575		S75	0	0
S76	14.1048	17.9516			S76	1.3619	1.73333	S76	0.590438	0.751467	S76	0.482429	0.614	S76	11.67	14.8528		S76	0.000612857	0.00078
S77	11.5675	14.7223			S77	0	0	S77	0.000209524	0.000266667	S77	4.268	5.432	S77	7.29929	9.29		S77	0	0
S78	7.51606	9.5659			S78	0	0	S78	0.000314286	0.0004	S78	1.34043	1.706	S78	6.17532	7.8595		S78	0	0
S79	2.90578	3.69827			S79	0	0	S79	0.000209524	0.000266667	S79	0.572	0.728	S79	2.33357	2.97		S79	0	0
S80	7.56605	9.62952			S80	0	0	S80	0.000209524	0.000266667	S80	1.41271	1.798	S80	6.15313	7.83125		S80	0	0
S81	0.46771	0.595267			S81	0	0	S81	0.000209524	0.000266667	S81	0.234143	0.298	S81	0.233357	0.297		S81	0	0
S82	1.5291	1.94613			S82	0	0	S82	0.000104762	0.000133333	S82	1.24929	1.59	S82	0.279714	0.356		S82	0	0
S83	8.3899	10.678			S83	0	0	S83	0.000628571	0.0008	S83	0.957	1.218	S83	7.43227	9.45925		S83	0	0
S84	6.5946	8.39313			S84	0	0	S84	0.000104762	0.000133333	S84	0.403857	0.514	S84	6.19064	7.879		S84	0	0
S85	0.514695	0.655067			S85	0	0	S85	0.000838095	0.00106667	S85	0.251429	0.32	S85	0.262429	0.334		S85	0	0
S86	3.31354	4.21723			S86	0	0	S86	0.0013619	0.00173333	S86	1.23043	1.566	S86	2.08175	2.6495		S86	0	0
S87	3.3912	4.31607			S87	0	0	S87	0.000838095	0.00106667	S87	1.58557	2.018	S87	1.80479	2.297		S87	0	0
S88	0.975294	1.24128			S88	0	0	S88	0.0035619	0.00453333	S88	0.375571	0.478	S88	0.596161	0.75875		S88	0	0
S89	12.6892	16.1499			S89	7.54286	9.6	S89	0.00502857	0.0064	S89	0.531143	0.676	S89	4.61018	5.8675		S89	0.00339429	0.00432
S90	6.78116	8.63057			S90	0	0	S90	0.000838095	0.00106667	S90	0.424286	0.54	S90	6.35604	8.0895		S90	0	0
S91	13.8372	17.611			S91	0	0	S91	0.000209524	0.000266667	S91	3.201	4.074	S91	10.636	13.5367		S91	0	0
S92	6.21581	7.91103			S92	0	0	S92	0.0789905	0.100533	S92	0.429	0.546	S92	5.70782	7.2645		S92	0	0
S93	15.2584	19.4198			S93	5.2381	6.66667	S93	0.0456762	0.0581333	S93	0.542143	0.69	S93	9.4325	12.005		S93	0.00235714	0.003
S94	6.05526	7.7067			S94	0	0	S94	0.000942857	0.0012	S94	0.216857	0.276	S94	5.83746	7.4295		S94	0	0
S95	6.45934	8.22098			S95	0	0	S95	0.00450476	0.00573333	S95	0.275	0.35	S95	6.17984	7.86525		S95	0	0
S96	15.2265	19.3791			S96	1.15238	1.46667	S96	1.0163	1.29347	S96	0.765286	0.974	S96	12.2925	15.645		S96	0.000518571	0.00066
S97	12.5281	15.9449			S97	0	0	S97	0.564038	0.717867	S97	0.370857	0.472	S97	11.5932	14.755		S97	0	0
S98	7.0812	9.01243			S98	0	0	S98	0.000733333	0.000933333	S98	1.034	1.316	S98	6.04646	7.6955		S98	0	0
S99	7.6879	9.7846			S99	0	0	S99	0.1804	0.2296	S99	0.477714	0.608	S99	7.02979	8.947		S99	0	0
Average	7.81041	9.94053				2.03704	2.59259		0.0849989	0.10818		0.715286	0.910364		4.97309	6.32939			0.000916667	0.00116667
